# Supplementary material for: An experimental and theoretical NMR study of NH-benzimidazoles in solution and in the solid state: proton transfer and tautomerism
Source: PubMed Central journal article supplement (PMC4142846; doi:10.3762/bjoc.10.168), 2014-07-16
Supplement: Beilstein_J_Org_Chem-10-1620-s001.pdf [file Beilstein_J_Org_Chem-10-1620-s001.pdf]

Supporting Information  
for

**An experimental and theoretical NMR study of NH-benzimidazoles in solution and in the solid state:  
proton transfer and tautomerism**

Carla I. Nieto<sup>1</sup>, Pilar Cabildo<sup>1</sup>, M. Ángeles García<sup>1</sup>, Rosa M. Claramunt\*<sup>1</sup>, Ibon Alkorta\*<sup>2</sup> and José Elguero<sup>2</sup>

Address: <sup>1</sup>Departamento de Química Orgánica y Bio-Orgánica, Facultad de Ciencias, UNED Senda del Rey 9, E-28040 Madrid, Spain and <sup>2</sup>Instituto de Química Médica, CSIC, Juan de la Cierva, 3, E-28006 Madrid, Spain

Email: Rosa M. Claramunt\* - [rclaramunt@ccia.uned.es](mailto:rclaramunt@ccia.uned.es); Ibon Alkorta\* - [ibon@iqm.csic.es](mailto:ibon@iqm.csic.es)

\*Corresponding author

**Optimized geometry of the systems, and chemical shifts in gas phase and PCM/DMSO environment**

Cartesian coordinates and GIAO results of the systems studied.

| Cartesian Coordinates, Å                     | GIAO Results (gas phase), ppm. |        |         | GIAO results (DMSO), ppm |        |         |
|----------------------------------------------|--------------------------------|--------|---------|--------------------------|--------|---------|
| <b>Bzml</b>                                  | Atom                           | Abs.   | Rel.    | Atom                     | Abs.   | Rel.    |
| N, 1.0447718408, 1.5952001503, 0.            | 1N                             | 101.09 | -247.63 | 1N                       | 93.12  | -240.09 |
| C, -0.1269434872, 2.3178825537, 0.           | 2C                             | 40.41  | 136.78  | 2C                       | 36.27  | 140.77  |
| N, -1.1973208861, 1.5720869895, 0.           | 3N                             | -27.99 | -125.53 | 3N                       | -11.90 | -140.75 |
| C, 0.6897292343, 0.2567343558, 0.            | 4C                             | 44.65  | 132.70  | 4C                       | 43.78  | 133.54  |
| C, -0.7239690703, 0.2658149217, 0.           | 5C                             | 32.22  | 144.67  | 5C                       | 32.69  | 144.22  |
| C, -1.4271684315, -0.9434622051, 0.          | 6C                             | 56.11  | 121.67  | 6C                       | 58.28  | 119.58  |
| C, -0.6952548717, -2.1234790872, 0.          | 7C                             | 56.10  | 121.68  | 7C                       | 55.98  | 121.79  |
| C, 0.7131279626, -2.1140327959, 0.           | 8C                             | 54.85  | 122.88  | 8C                       | 54.68  | 123.04  |
| C, 1.4320051919, -0.9241180748, 0.           | 9C                             | 70.07  | 108.23  | 9C                       | 67.20  | 110.99  |
| H, -2.5104902505, -0.9450248201, 0.          | 10H                            | 23.91  | 7.81    | 10H                      | 23.93  | 7.79    |
| H, -1.2144606297, -3.0749736326, 0.          | 11H                            | 24.53  | 7.20    | 11H                      | 24.40  | 7.34    |
| H, 1.2487936774, -3.0563873731, 0.           | 12H                            | 24.50  | 7.24    | 12H                      | 24.32  | 7.41    |
| H, 1.9784271004, 1.9730078446, 0.            | 13H                            | 23.75  | 7.96    | 13H                      | 22.80  | 8.88    |
| H, 2.5160257678, -0.9226868796, 0.           | 14H                            | 24.41  | 7.32    | 14H                      | 24.05  | 7.67    |
| H, -0.1206469281, 3.3985992527, 0.           | 15H                            | 24.08  | 7.64    | 15H                      | 23.77  | 7.95    |
| <b>2MeBzml</b>                               | Atom                           | Abs.   | Rel.    | Atom                     | Abs.   | Rel.    |
| N, 1.0786363707, 1.1170915268, 0.            | 1N                             | 100.29 | -246.87 | 1N                       | 93.44  | -240.39 |
| C, -0.0786777599, 1.8738466247, 0.           | 2C                             | 30.28  | 146.54  | 2C                       | 24.92  | 151.70  |
| N, -1.1576925089, 1.1338766506, 0.           | 3N                             | -25.65 | -127.73 | 3N                       | -10.41 | -142.15 |
| C, 0.701913, -0.2163545654, 0.               | 4C                             | 41.71  | 135.53  | 4C                       | 40.97  | 136.25  |
| C, -0.710475032, -0.1816292591, 0.           | 5C                             | 31.80  | 145.08  | 5C                       | 32.29  | 144.60  |
| C, -1.4344376075, -1.377124155, 0.           | 6C                             | 57.03  | 120.78  | 6C                       | 59.36  | 118.54  |
| C, -0.724212985, -2.5721869176, 0.           | 7C                             | 56.57  | 121.22  | 7C                       | 56.70  | 121.09  |
| C, 0.6825192319, -2.5883626677, 0.           | 8C                             | 55.86  | 121.91  | 8C                       | 55.91  | 121.86  |
| C, 1.4221254757, -1.4091297328, 0.           | 9C                             | 70.51  | 107.79  | 9C                       | 67.90  | 110.32  |
| H, -2.5177659031, -1.3597234831, 0.          | 10H                            | 24.02  | 7.70    | 10H                      | 24.04  | 7.68    |
| H, -1.2615091178, -3.5136574743, 0.          | 11H                            | 24.63  | 7.11    | 11H                      | 24.50  | 7.23    |
| H, 1.2021976605, -3.5396509248, 0.           | 12H                            | 24.68  | 7.06    | 12H                      | 24.52  | 7.21    |
| H, 2.0203519125, 1.474464536, 0.             | 13H                            | 24.17  | 7.56    | 13H                      | 23.29  | 8.41    |
| H, 2.5061581923, -1.4268879489, 0.           | 14H                            | 24.53  | 7.21    | 14H                      | 24.19  | 7.54    |
| C, -0.0490998154, 3.3653337307, 0.           | 15C                            | 167.53 | 14.37   | 15C                      | 167.48 | 14.42   |
| H, 0.4641704726, 3.7553876066, 0.8848570963  | 16H                            | 29.57  | 2.31    | 16H                      | 29.32  | 2.56    |
| H, 0.4641704726, 3.7553876066, -0.8848570963 | 17H                            | 29.57  | 2.31    | 17H                      | 29.32  | 2.56    |
| H, -1.0728564891, 3.7364282664, 0.           | 18H                            | 29.28  | 2.60    | 18H                      | 29.49  | 2.39    |
| <b>2CF3Bzml</b>                              | Atom                           | Abs.   | Rel.    | Atom                     | Abs.   | Rel.    |
| N, -1.088545208, 0.1282749352, 0.            | 1N                             | 100.85 | -247.40 | 1N                       | 94.62  | -241.51 |
| C, 0.0704393989, 0.8663745508, 0.            | 2C                             | 38.15  | 138.96  | 2C                       | 37.55  | 139.54  |
| N, 1.1573628356, 0.1495772606, 0.            | 3N                             | -33.45 | -120.36 | 3N                       | -21.06 | -132.07 |
|                                              | 4C                             | 45.10  | 132.27  | 4C                       | 44.09  | 133.24  |

|                                                |      |        |         |      |        |         |
|------------------------------------------------|------|--------|---------|------|--------|---------|
| C, -0.7022419804, -1.199046167, 0.             | 5C   | 32.35  | 144.54  | 5C   | 33.05  | 143.87  |
| C, 0.712070524, -1.1625164605, 0.              | 6C   | 55.09  | 122.65  | 6C   | 56.92  | 120.89  |
| C, 1.4430587625, -2.3567601223, 0.             | 7C   | 53.60  | 124.08  | 7C   | 52.81  | 124.84  |
| C, 0.7343073058, -3.5482197699, 0.             | 8C   | 51.73  | 125.89  | 8C   | 50.90  | 126.68  |
| C, -0.6757631543, -3.5668563621, 0.            | 9C   | 69.19  | 109.07  | 9C   | 66.15  | 112.00  |
| C, -1.4212274846, -2.3956953916, 0.            | 10H  | 23.32  | 8.38    | 10H  | 22.55  | 9.13    |
| H, -2.0259472781, 0.4991465566, 0.             | 11C  | 54.18  | 123.53  | 11C  | 53.72  | 123.96  |
| C, 0.0402828589, 2.3688693244, 0.              | 12F  | 228.54 | -57.07  | 12F  | 228.53 | -57.06  |
| F, 0.639338844, 2.8897334643, 1.0834580854     | 13F  | 248.18 | -75.90  | 13F  | 249.74 | -77.40  |
| F, -1.2489897468, 2.8038254873, 0.             | 14F  | 228.54 | -57.07  | 14F  | 228.53 | -57.06  |
| F, 0.639338844, 2.8897334643, -1.0834580854    | 15H  | 23.84  | 7.87    | 15H  | 23.83  | 7.88    |
| H, 2.5259765006, -2.3350551494, 0.             | 16H  | 24.30  | 7.43    | 16H  | 24.14  | 7.59    |
| H, 1.2713771803, -4.4896811484, 0.             | 17H  | 24.36  | 7.37    | 17H  | 24.16  | 7.57    |
| H, -1.1903439433, -4.5209024332, 0.            | 18H  | 24.42  | 7.31    | 18H  | 24.06  | 7.67    |
| H, -2.5047081294, -2.4162405591, 0.            |      |        |         |      |        |         |
| <b>2BnBzml</b>                                 | Atom | Abs.   | Rel.    | Atom | Abs.   | Rel.    |
| N, 0.9468942508, 1.5351059604, 0.3745382542    | 1N   | 98.73  | -245.40 | 1N   | 94.20  | -241.11 |
| C, -0.173709052, 2.2852340815, 0.0831540611    | 2C   | 25.16  | 151.48  | 2C   | 21.47  | 155.02  |
| N, -1.1978799082, 1.5480768326, -0.2649260888  | 3N   | -22.84 | -130.39 | 3N   | -11.09 | -141.51 |
| C, 0.6047063981, 0.2037369981, 0.2087849278    | 4C   | 43.02  | 134.27  | 4C   | 41.81  | 135.43  |
| C, -0.7475948692, 0.2355927341, -0.2018860808  | 5C   | 32.78  | 144.14  | 5C   | 33.51  | 143.43  |
| C, -1.4223041431, -0.9599942499, -0.4656572137 | 6C   | 57.36  | 120.46  | 6C   | 59.39  | 118.51  |
| C, -0.7250143526, -2.1520977471, -0.3092653792 | 7C   | 55.86  | 121.91  | 7C   | 55.54  | 122.22  |
| C, 0.6204851861, -2.1658238024, 0.1028100195   | 8C   | 55.10  | 122.64  | 8C   | 54.94  | 122.79  |
| C, 1.3104137955, -0.9872689073, 0.370070241    | 9C   | 71.09  | 107.24  | 9C   | 68.45  | 109.79  |
| H, -2.458516213, -0.9446413836, -0.7818342019  | 10H  | 23.98  | 7.74    | 10H  | 24.02  | 7.70    |
| H, -1.224405677, -3.0935703945, -0.5075897416  | 11H  | 24.46  | 7.27    | 11H  | 24.35  | 7.38    |
| H, 1.1312711954, -3.1154571142, 0.2140294436   | 12H  | 24.62  | 7.12    | 12H  | 24.45  | 7.28    |
| H, 1.814355598, 1.8995278248, 0.7361789435     | 13H  | 24.52  | 7.22    | 13H  | 23.54  | 8.16    |
| H, 2.3471063055, -1.0030357793, 0.6867037224   | 14H  | 24.79  | 6.95    | 14H  | 24.41  | 7.32    |
| C, -0.1626925734, 3.7869566319, 0.1223905701   | 15C  | 142.23 | 38.73   | 15C  | 142.55 | 38.42   |
| H, 0.2429918958, 4.1619673883, -0.8241501432   | 16H  | 27.96  | 3.88    | 16H  | 27.78  | 4.06    |
| H, -1.2061247413, 4.1064323338, 0.1632462562   | 17H  | 27.33  | 4.49    | 17H  | 27.44  | 4.38    |
| C, 0.6302454415, 4.3693279814, 1.2773032201    | 18C  | 37.35  | 139.73  | 18C  | 37.25  | 139.83  |
| C, 1.858361622, 5.0010687593, 1.0608452229     | 19C  | 48.87  | 128.64  | 19C  | 48.18  | 129.31  |
| C, 0.1493760059, 4.2716387772, 2.5892685522    | 20C  | 47.45  | 130.00  | 20C  | 48.25  | 129.24  |
| C, 2.5931603639, 5.5220371137, 2.1274547165    | 21C  | 48.98  | 128.53  | 21C  | 48.13  | 129.35  |
| H, 2.2398689989, 5.0959653623, 0.0487782545    | 22H  | 24.43  | 7.30    | 22H  | 24.09  | 7.63    |
| C, 0.8784210142, 4.7919830467, 3.6546609616    | 23C  | 48.29  | 129.20  | 23C  | 47.93  | 129.54  |
| H, -0.802685091, 3.7843423418, 2.7735441851    | 24H  | 24.43  | 7.31    | 24H  | 24.28  | 7.45    |
| C, 2.1047522459, 5.4183732233, 3.4270673779    | 25C  | 50.82  | 126.76  | 25C  | 50.41  | 127.15  |
| H, 3.5417290324, 6.0126795613, 1.9395430865    | 26H  | 24.34  | 7.39    | 26H  | 24.14  | 7.58    |
|                                                | 27H  | 24.37  | 7.36    | 27H  | 24.33  | 7.40    |

|                                                                                            |      |        |         |      |        |         |
|--------------------------------------------------------------------------------------------|------|--------|---------|------|--------|---------|
| H, 0.4889600395, 4.7120562898, 4.6634705167<br>H, 2.6711494214, 5.8253642461, 4.2569768556 | 28H  | 24.39  | 7.34    | 28H  | 24.35  | 7.38    |
| <b>NMeBzml</b>                                                                             | Atom | Abs.   | Rel.    | Atom | Abs.   | Rel.    |
| N, 0.1973531317, 1.5292476812, 0.                                                          | 1N   | 94.34  | -241.25 | 1N   | 84.68  | -232.11 |
| C, -1.1613902791, 1.7524415488, 0.                                                         | 2C   | 36.21  | 140.83  | 2C   | 32.77  | 144.14  |
| N, -1.8822503836, 0.6633289358, 0.                                                         | 3N   | -24.97 | -128.38 | 3N   | -8.71  | -143.76 |
| C, 0.3575600246, 0.1542582597, 0.                                                          | 4C   | 41.66  | 135.58  | 4C   | 41.00  | 136.21  |
| C, -0.9567376675, -0.3699383414, 0.                                                        | 5C   | 30.34  | 146.49  | 5C   | 31.26  | 145.60  |
| C, -1.152783442, -1.7545046265, 0.                                                         | 6C   | 55.96  | 121.81  | 6C   | 58.24  | 119.62  |
| C, -0.0303929082, -2.5731192871, 0.                                                        | 7C   | 56.23  | 121.55  | 7C   | 56.05  | 121.73  |
| C, 1.2710521359, -2.0353519288, 0.                                                         | 8C   | 55.43  | 122.32  | 8C   | 55.21  | 122.53  |
| C, 1.4897519541, -0.6618042503, 0.                                                         | 9C   | 71.86  | 106.50  | 9C   | 68.88  | 109.36  |
| H, -2.155902354, -2.1639329707, 0.                                                         | 10H  | 23.92  | 7.80    | 10H  | 23.95  | 7.77    |
| H, -0.1541163199, -3.6500276907, 0.                                                        | 11H  | 24.50  | 7.23    | 11H  | 24.37  | 7.36    |
| H, 2.1216920507, -2.7072867887, 0.                                                         | 12H  | 24.54  | 7.20    | 12H  | 24.37  | 7.36    |
| H, 2.4944208999, -0.2548272784, 0.                                                         | 13H  | 24.50  | 7.24    | 13H  | 24.13  | 7.59    |
| H, -1.5560175517, 2.759529197, 0.                                                          | 14H  | 24.32  | 7.41    | 14H  | 23.98  | 7.74    |
| C, 1.2507075923, 2.5262539525, 0.                                                          | 15C  | 151.53 | 29.78   | 15C  | 150.58 | 30.69   |
| H, 1.8784428489, 2.427710146, 0.8900347714                                                 | 16H  | 28.22  | 3.62    | 16H  | 28.09  | 3.75    |
| H, 1.8784428489, 2.427710146, -0.8900347714                                                | 17H  | 28.22  | 3.62    | 17H  | 28.09  | 3.75    |
| H, 0.7995486789, 3.5188423855, 0.                                                          | 18H  | 28.21  | 3.63    | 18H  | 27.95  | 3.89    |

| Cartesian Coordinates, Å<br><b>(Bzml)3-A</b>   | GIAO Results (gas phase), ppm. |        |         | GIAO results (DMSO), ppm |       |         |
|------------------------------------------------|--------------------------------|--------|---------|--------------------------|-------|---------|
|                                                | Atom                           | Abs.   | Rel.    | Atom                     | Abs.  | Rel.    |
| N, 3.8335149515, -0.3241064127, -0.8698501156  | 1N                             | 80.36  | -228.02 | 1N                       | 74.29 | -222.28 |
| C, 4.3438343002, -0.527635567, -2.1247213037   | 2C                             | 37.37  | 139.71  | 2C                       | 37.17 | 139.91  |
| N, 5.5237325073, -1.0982372018, -2.1388159035  | 3N                             | -23.47 | -129.80 | 3N                       | -8.92 | -143.57 |
| C, 4.7749611457, -0.812826972, 0.0142079066    | 4C                             | 42.57  | 134.70  | 4C                       | 42.38 | 134.88  |
| C, 5.8294959424, -1.2944663957, -0.8000560101  | 5C                             | 31.13  | 145.72  | 5C                       | 32.05 | 144.84  |
| C, 6.9623273776, -1.8647393268, -0.2082829153  | 6C                             | 57.14  | 120.68  | 6C                       | 58.85 | 119.03  |
| C, 7.0097972074, -1.9379462942, 1.1779679098   | 7C                             | 57.86  | 119.98  | 7C                       | 56.76 | 121.04  |
| C, 5.9532042134, -1.4536477932, 1.9747387759   | 8C                             | 56.94  | 120.87  | 8C                       | 55.80 | 121.97  |
| C, 4.8191533745, -0.8829109185, 1.4081990381   | 9C                             | 69.06  | 109.20  | 9C                       | 66.69 | 111.48  |
| H, 7.7731910996, -2.2347229669, -0.8248156977  | 10H                            | 23.97  | 7.75    | 10H                      | 23.88 | 7.84    |
| H, 7.8764868694, -2.3746909849, 1.6615790209   | 11H                            | 24.62  | 7.12    | 11H                      | 24.39 | 7.34    |
| H, 6.0282153687, -1.526073047, 3.0541261966    | 12H                            | 24.67  | 7.07    | 12H                      | 24.39 | 7.35    |
| H, 2.9185260403, 0.0900256637, -0.6432723922   | 13H                            | 17.55  | 13.98   | 13H                      | 15.87 | 15.61   |
| H, 4.00942387, -0.5075624991, 2.0233323133     | 14H                            | 24.36  | 7.37    | 14H                      | 23.93 | 7.79    |
| H, 3.7940001449, -0.22943233, -3.0064267181    | 15H                            | 23.84  | 7.87    | 15H                      | 23.61 | 8.10    |
| C, 0.6867726046, 2.0383102178, -0.039294426    | 16C                            | 33.07  | 143.85  | 16C                      | 33.32 | 143.62  |
| C, 0.1088435139, -0.0270019873, -0.0821014673  | 17C                            | 38.06  | 139.05  | 17C                      | 35.14 | 141.86  |
| C, -0.6958806427, 1.9952320887, 0.2528188497   | 18C                            | 43.17  | 134.13  | 18C                      | 42.51 | 134.76  |
| C, 1.3574790837, 3.265647384, -0.0829542826    | 19C                            | 57.99  | 119.85  | 19C                      | 59.63 | 118.28  |
| H, 0.1196270345, -1.1038948443, -0.1713360067  | 20H                            | 23.70  | 8.01    | 20H                      | 23.38 | 8.32    |
| C, -1.4393884449, 3.1498843646, 0.5043480542   | 21C                            | 68.22  | 110.00  | 21C                      | 66.28 | 111.88  |
| C, 0.6215055654, 4.4159188404, 0.1670676116    | 22C                            | 55.66  | 122.10  | 22C                      | 55.85 | 121.91  |
| H, 2.4171232624, 3.3089633525, -0.3051746868   | 23H                            | 23.82  | 7.89    | 23H                      | 23.79 | 7.93    |
| C, -0.7563834253, 4.3588555228, 0.4562769718   | 24C                            | 54.80  | 122.93  | 24C                      | 55.01 | 122.73  |
| H, -2.4992466709, 3.1086961945, 0.7262384178   | 25H                            | 24.24  | 7.49    | 25H                      | 23.95 | 7.77    |
| H, 1.114122929, 5.3810447083, 0.1400567542     | 26H                            | 24.47  | 7.26    | 26H                      | 24.34 | 7.39    |
| H, -1.2952102305, 5.2803324304, 0.6450511472   | 27H                            | 24.45  | 7.28    | 27H                      | 24.34 | 7.39    |
| N, 1.1587205699, 0.7473044041, -0.2441409922   | 28N                            | -10.33 | -142.23 | 28N                      | -2.92 | -149.24 |
| N, -1.0330307843, 0.6540653638, 0.2164861453   | 29N                            | 80.22  | -227.89 | 29N                      | 74.08 | -222.08 |
| C, -4.7074192737, -0.824275509, -0.109898448   | 30C                            | 34.43  | 142.54  | 30C                      | 34.36 | 142.61  |
| C, -4.0220079739, -1.0947327594, 1.9096362952  | 31C                            | 39.44  | 137.72  | 31C                      | 35.56 | 141.46  |
| C, -5.7511453891, -1.4808499157, 0.5764598996  | 32C                            | 44.57  | 132.78  | 32C                      | 43.47 | 133.84  |
| C, -4.8521987227, -0.5034115691, -1.4636968556 | 33C                            | 57.56  | 120.27  | 33C                      | 59.03 | 118.86  |
| H, -3.4319833415, -1.0900585896, 2.8145937633  | 34H                            | 23.72  | 7.99    | 34H                      | 23.37 | 8.33    |
| C, -6.9488598641, -1.8349572782, -0.0438912437 | 35C                            | 68.61  | 109.63  | 35C                      | 66.37 | 111.78  |
| C, -6.0416523086, -0.8531083713, -2.0874674093 | 36C                            | 53.97  | 123.73  | 36C                      | 55.00 | 122.73  |
| H, -4.0584097316, 0.0011689761, -2.0011460585  | 37H                            | 23.79  | 7.92    | 37H                      | 23.79 | 7.92    |
| H, -5.7576531346, -2.0719453472, 2.6419337827  | 38H                            | 23.57  | 8.14    | 38H                      | 22.74 | 8.94    |
| C, -7.0738503753, -1.5086916277, -1.3885211084 | 39C                            | 52.83  | 124.83  | 39C                      | 53.83 | 123.87  |

|                                                  |      |        |         |      |       |         |
|--------------------------------------------------|------|--------|---------|------|-------|---------|
| H, -7.7457576772, -2.3395707188, 0.4896023196    | 40H  | 24.24  | 7.49    | 40H  | 23.93 | 7.79    |
| H, -6.1832301906, -0.6181497701, -3.1357422954   | 41H  | 24.30  | 7.43    | 41H  | 24.28 | 7.45    |
| H, -7.9872038121, -1.7648049195, -1.9124028021   | 42H  | 24.28  | 7.45    | 42H  | 24.21 | 7.52    |
| N, -3.6421992565, -0.5998628747, 0.7580891321    | 43N  | -12.94 | -139.76 | 43N  | -5.34 | -146.95 |
| N, -5.2767443531, -1.6382322993, 1.869928173     | 44N  | 98.38  | -245.06 | 44N  | 92.22 | -239.24 |
| H, -1.9580363731, 0.2358605791, 0.3895996602     | 45H  | 17.33  | 14.19   | 45H  | 16.05 | 15.43   |
| <b>(Bzml)3-B</b>                                 | Atom | Abs.   | Rel.    | Atom | Abs.  | Rel.    |
| N, 0, 3.8117500763, -0.3785196023, -0.8506143272 | 1N   | 81.17  | -228.79 | 1N   | 74.06 | -222.06 |
| C, 0, 4.2271544252, -0.6024871592, -2.1365764163 | 2C   | 38.34  | 138.78  | 2C   | 35.22 | 141.78  |
| N, 0, 5.4196905998, -1.1381874192, -2.2305336586 | 3N   | -23.28 | -129.98 | 3N   | -9.23 | -143.27 |
| C, 0, 4.8356651524, -0.813210648, -0.032405302   | 4C   | 42.31  | 134.95  | 4C   | 41.96 | 135.29  |
| C, 0, 5.8368801919, -1.2866634431, -0.9158531949 | 5C   | 31.24  | 145.62  | 5C   | 32.20 | 144.69  |
| C, 0, 7.0306524937, -1.8063424402, -0.402479416  | 6C   | 57.35  | 120.48  | 6C   | 59.13 | 118.76  |
| C, 0, 7.1905882071, -1.8385215442, 0.9768520229  | 7C   | 57.46  | 120.36  | 7C   | 56.45 | 121.34  |
| C, 0, 6.1858470463, -1.3630646063, 1.8429971884  | 8C   | 56.95  | 120.86  | 8C   | 56.04 | 121.74  |
| C, 0, 4.9927880345, -0.8424116754, 1.3548625901  | 9C   | 69.06  | 109.20  | 9C   | 67.27 | 110.92  |
| H, 0, 7.8010209765, -2.1698833298, -1.072471531  | 10H  | 23.93  | 7.78    | 10H  | 23.89 | 7.82    |
| H, 0, 8.1062878182, -2.2357282864, 1.400512215   | 11H  | 24.51  | 7.23    | 11H  | 24.28 | 7.45    |
| H, 0, 6.3484425689, -1.4027909073, 2.9143921956  | 12H  | 24.62  | 7.12    | 12H  | 24.38 | 7.35    |
| H, 0, 2.9057874924, 0.0189695985, -0.5655595624  | 13H  | 17.22  | 14.30   | 13H  | 15.86 | 15.62   |
| H, 0, 4.2228445134, -0.4748841511, 2.023479897   | 14H  | 24.32  | 7.41    | 14H  | 24.06 | 7.66    |
| H, 0, 3.5999433153, -0.3454892286, -2.9787121114 | 15H  | 23.89  | 7.83    | 15H  | 23.61 | 8.10    |
| C, 0, 0.7077819744, 1.9799113199, 0.0653539882   | 16C  | 33.09  | 143.84  | 16C  | 33.59 | 143.35  |
| C, 0, 0.1043147301, -0.0782976734, 0.0947328422  | 17C  | 38.90  | 138.24  | 17C  | 35.86 | 141.16  |
| C, 0, -0.6711141291, 1.9635848884, 0.3767744798  | 18C  | 43.26  | 134.04  | 18C  | 42.65 | 134.62  |
| C, 0, 1.3932475851, 3.1964595524, -0.0257204236  | 19C  | 57.85  | 119.99  | 19C  | 59.48 | 118.42  |
| H, 0, 0.1009624837, -1.1575880195, 0.0412033422  | 20H  | 23.77  | 7.95    | 20H  | 23.47 | 8.24    |
| C, 0, -1.3963651868, 3.1350298181, 0.6028742856  | 21C  | 68.04  | 110.18  | 21C  | 66.15 | 112.00  |
| C, 0, 0.6751970164, 4.3633801094, 0.1977975999   | 22C  | 55.74  | 122.02  | 22C  | 55.89 | 121.87  |
| H, 0, 2.4503152625, 3.2191270412, -0.2628020026  | 23H  | 23.81  | 7.91    | 23H  | 23.82 | 7.90    |
| C, 0, -0.6990430187, 4.3330086793, 0.5074729409  | 24C  | 55.02  | 122.72  | 24C  | 55.06 | 122.68  |
| H, 0, -2.4528052049, 3.1143817413, 0.8431314221  | 25H  | 24.24  | 7.48    | 25H  | 23.97 | 7.75    |
| H, 0, 1.1794642335, 5.3207508893, 0.1345117992   | 26H  | 24.46  | 7.28    | 26H  | 24.35 | 7.38    |
| H, 0, -1.2233195341, 5.2666911831, 0.6762226613  | 27H  | 24.48  | 7.26    | 27H  | 24.34 | 7.39    |
| N, 0, 1.161166954, 0.6773358625, -0.1054458847   | 28N  | -10.35 | -142.21 | 28N  | -2.99 | -149.18 |
| N, 0, -1.0249227786, 0.6262186389, 0.3873132876  | 29N  | 80.13  | -227.80 | 29N  | 73.91 | -221.92 |
| C, 0, -4.2450868003, -0.9503955797, 2.0800056724 | 30C  | 34.64  | 142.35  | 30C  | 34.39 | 142.58  |
| C, 0, -4.5552530998, -0.8908532166, -0.046376941 | 31C  | 40.10  | 137.08  | 31C  | 36.09 | 140.94  |
| C, 0, -5.5191819624, -1.5125330608, 1.851314911  | 32C  | 44.69  | 132.66  | 32C  | 43.58 | 133.73  |
| C, 0, -3.748857369, -0.8460551913, 3.3836606867  | 33C  | 57.72  | 120.12  | 33C  | 59.27 | 118.62  |
| H, 0, -4.4351673939, -0.7342871745, -1.108501074 | 34H  | 23.80  | 7.91    | 34H  | 23.43 | 8.27    |
| C, 0, -6.3275197579, -1.9811367152, 2.8866021322 | 35C  | 68.72  | 109.52  | 35C  | 66.40 | 111.76  |
|                                                  | 36C  | 53.87  | 123.82  | 36C  | 54.96 | 122.77  |

|                                                  |     |        |         |     |       |         |
|--------------------------------------------------|-----|--------|---------|-----|-------|---------|
| C, 0, -4.5480713977, -1.3106346523, 4.4187682753 | 37H | 23.77  | 7.94    | 37H | 23.78 | 7.94    |
| H, 0, -2.7725773875, -0.4158844615, 3.5717354186 | 38H | 23.57  | 8.14    | 38H | 22.78 | 8.91    |
| H, 0, -6.4845010058, -1.7750345558, -            | 39C | 52.79  | 124.86  | 39C | 53.68 | 124.01  |
| 0.0499684377                                     | 40H | 24.26  | 7.47    | 40H | 23.95 | 7.77    |
| C, 0, -5.8175657301, -1.8694601798, 4.1740829655 | 41H | 24.26  | 7.47    | 41H | 24.24 | 7.49    |
| H, 0, -7.3047962453, -2.4120535747, 2.7035021526 | 42H | 24.20  | 7.53    | 42H | 24.12 | 7.61    |
| H, 0, -4.1909515883, -1.2437830112, 5.4396126303 | 43N | -12.44 | -140.24 | 43N | -4.88 | -147.39 |
| H, 0, -6.4104317334, -2.2208117357, 5.0103471361 | 44N | 98.50  | -245.18 | 44N | 92.32 | -239.34 |
| N, 0, -3.672987563, -0.5734570572, 0.8679505625  | 45H | 17.31  | 14.21   | 45H | 16.05 | 15.43   |
| N, 0, -5.6853996334, -1.4580147914, 0.4756950378 |     |        |         |     |       |         |
| H, 0, -1.9558126315, 0.2258885091, 0.5703557448  |     |        |         |     |       |         |
